# Supplementary material for: Development of an mRNA replacement therapy for phenylketonuria
Source: PubMed Central journal article supplement — Mol Ther Nucleic Acids. 2022 Feb 28;28:87–98. doi: 10.1016/j.omtn.2022.02.020 (PMC8933640; doi:10.1016/j.omtn.2022.02.020), 2022-02-28
Supplement: mmc1.pdf [file mmc1.pdf]

**OMTN, Volume 28**

## **Supplemental information**

### **Development of an mRNA**

#### **replacement therapy for phenylketonuria**

**Carlos G. Perez-Garcia, Ramon Diaz-Trelles, Jerel Boyd Vega, Yanjie Bao, Marciano Sablad, Patty Limphong, Simon Chikamatsu, Hailong Yu, Wendy Taylor, Priya P. Karmali, Kiyoshi Tachikawa, and Padmanabh Chivukula**

A

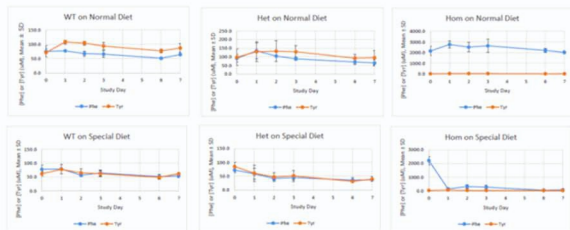

B

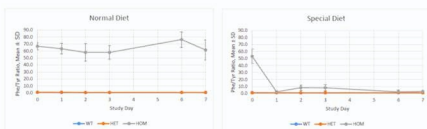

C

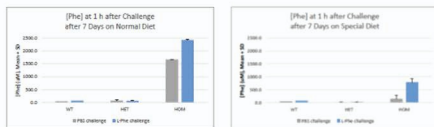

Figure S1. Phenylalanine metabolic characterization in WT, and heterozygous (Het) and homozygous (Hom) BTBR- Pahenu2 mice under normal or special Phe-restricted diet. A: Phe (blue) and Tyr (orange) plasma levels were measured for a week at 24 hours intervals under normal (top graphs) or special Phe-free diet (bottom graphs) in WT (left), Het Pahenu2 (middle) and Hom Pahenu2 (right) mice. B: Calculated Phe:Tyr ratios in WT (blue), Het (Orange) and Hom (gray) mice under normal (left graph) or special Phe-free diet (right graph). C: Plasma Phe levels in WT, Het and Hom Pahenu2 mice 1 hour after being challenge with an IV injection of either PBS or 100 mg/kg of Phe. Prior to the Phe challenge mice were for a week either under normal diet (left graph) or a special Phe-free diet (right graph). (N=10 mice per control group; n=14 mice per group in special diet group; n=6-7 mice per group in C)

A

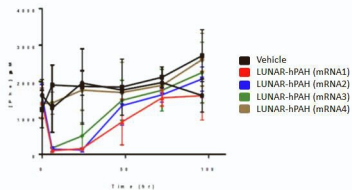

B

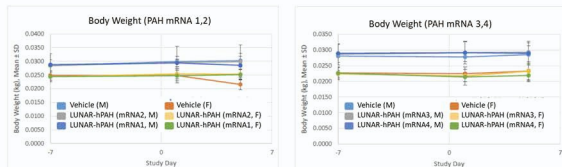

Figure S2. In vivo screening of hPAH using LUNAR<sup>®</sup>-hPAH mRNA (LUNAR 1) formulation in homozygous BTBR- Pahenu2 mice. A: Phe plasma levels and body weight (B) in mice at different time points before and after a 10 mg/kg single dose of LUNAR<sup>®</sup> formulation containing different hPAH mRNA.

A

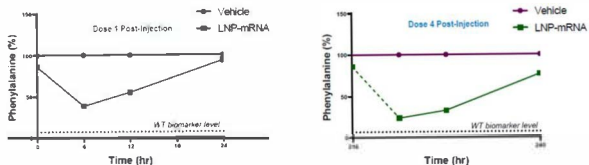

Figure S3. Efficacy of a dose of LUNAR®-hPAH mRNA (LUNAR 1) after repeated dosing. Phe plasma levels were measure at time 0-, 6-, 12- and 24-hours on the first (left graph) and last day of dosing (right graph). Dotted line indicates Phe WT levels. Vehicle indicate mice treated with PBS. (n=4 control, n=12 treated mice per groups)

|                                  | 11     | 12                     | 13     | 14                     | 15     |
|----------------------------------|--------|------------------------|--------|------------------------|--------|
| ALP (U/L)                        | 58     | 43                     | 87     | 35                     | 54     |
| AST (U/L)                        | 59     | 70                     | 32     | 55                     | 58     |
| ALT (U/L)                        | 34     | 30                     | 43     | 36                     | 39     |
| Creatine kinase (U/L)            | 208    | 308                    | 49     | 155                    | 168    |
| Albumin (g/dL)                   | 2.5    | 2.1                    | 2.5    | 2.6                    | 2.7    |
| Total Bilirubin (mg/dL)          | 0.2    | 0.2                    | 0.2    | 0.3                    | 0.2    |
| Total Protein (g/dL)             | 4.5    | 4.0                    | 4.3    | 4.8                    | 4.5    |
| Globulin (g/dL)                  | 2.0    | 1.9                    | 1.8    | 2.2                    | 1.8    |
| Bilirubin - Conjugated (mg/dL)   | 0.0    | 0.0                    | 0.0    | 0.0                    | 0.0    |
| BUN (mg/dL)                      | 18     | 15                     | 12     | 18                     | 15     |
| Creatinine (mg/dL)               | 0.1    | 0.0 <sup>1</sup>       | 0.1    | 0.0 <sup>1</sup>       | 0.1    |
| Cholesterol (mg/dL)              | 116    | 89                     | 105    | 105                    | 105    |
| Glucose (mg/dL)                  | 280    | 336                    | 298    | 334                    | 254    |
| Calcium (mg/dL)                  | 8.7    | 7.7                    | 9.2    | 9.3                    | 8.8    |
| Phosphorus (mg/dL)               | 7.4    | 7.8                    | 9.6    | 10.1                   | 7.6    |
| Bicarbonate TCO2 (mmol/L)        | 20     | 17                     | 19     | 21                     | 21     |
| Chloride (mmol/L)                | 116    | see below <sup>3</sup> | 115    | see below <sup>3</sup> | 116    |
| Potassium (mmol/L)               | 4.7    | see below <sup>3</sup> | 4.8    | see below <sup>3</sup> | 6.2    |
| ALB/GLOB ratio                   | 1.3    | 1.1                    | 1.4    | 1.2                    | 1.5    |
| Sodium (mmol/L)                  | 153    | see below <sup>3</sup> | 150    | see below <sup>3</sup> | 148    |
| BUN/Creatinine Ratio             | 180.0  | 0.0                    | 120.0  | 0.0                    | 150.0  |
| Bilirubin - Unconjugated (mg/dL) | 0.2    | 0.2                    | 0.2    | 0.3                    | 0.2    |
| NAK Ratio                        | 33     | see below <sup>3</sup> | 31     | see below <sup>3</sup> | 24     |
| Hemolysis Index                  | +      | Normal                 | Normal | +                      | ++     |
| Lipemia Index                    | Normal | Normal                 | Normal | Normal                 | Normal |

  

|                       | 26  | 27  | 28  | 29  | 41  |
|-----------------------|-----|-----|-----|-----|-----|
| ALP (U/L)             | 40  | 38  | 36  | 60  | 93  |
| AST (U/L)             | 117 | 72  | 40  | 49  | 49  |
| ALT (U/L)             | 46  | 70  | 37  | 44  | 33  |
| Creatine kinase (U/L) | 126 | 126 | 126 | 179 | 147 |

|                                  | 26     | 27     | 28               | 29     | 41     |
|----------------------------------|--------|--------|------------------|--------|--------|
| Albumin (g/dL)                   | 2.4    | 2.4    | 2.4              | 2.4    | 2.5    |
| Total Bilirubin (mg/dL)          | 0.2    | 0.2    | 0.2              | 0.2    | 0.1    |
| Total Protein (g/dL)             | 4.4    | 4.4    | 4.2              | 4.2    | 4.0    |
| Globulin (g/dL)                  | 2.0    | 2.0    | 1.8              | 1.8    | 1.5    |
| Bilirubin - Conjugated (mg/dL)   | 0.0    | 0.0    | 0.0              | 0.0    | 0.0    |
| BUN (mg/dL)                      | 16     | 19     | 15               | 18     | 12     |
| Creatinine (mg/dL)               | 0.1    | 0.1    | 0.1 <sup>1</sup> | 0.1    | 0.1    |
| Cholesterol (mg/dL)              | 136    | 134    | 132              | 127    | 84     |
| Glucose (mg/dL)                  | 345    | 251    | 337              | 307    | 322    |
| Calcium (mg/dL)                  | 9.5    | 9.2    | 8.8              | 8.8    | 8.9    |
| Phosphorus (mg/dL)               | 10.4   | 11.5   | 9.0              | 9.4    | 7.3    |
| Bicarbonate TCO2 (mmol/L)        | 18     | 19     | 21               | 21     | 19     |
| Chloride (mmol/L)                | 119    | 115    | 114              | 115    | 114    |
| Potassium (mmol/L)               | 6.1    | 5.8    | 5.5              | 6.1    | 4.9    |
| ALB/GLOB ratio                   | 1.2    | 1.2    | 1.3              | 1.3    | 1.7    |
| Sodium (mmol/L)                  | 157    | 153    | 148              | 149    | 145    |
| BUN/Creatinine Ratio             | 160.0  | 190.0  | 150.0            | 180.0  | 120.0  |
| Bilirubin - Unconjugated (mg/dL) | 0.2    | 0.2    | 0.2              | 0.2    | 0.1    |
| NAK Ratio                        | 26     | 26     | 27               | 24     | 30     |
| Hemolysis Index                  | +      | Normal | +                | Normal | Normal |
| Lipemia Index                    | Normal | Normal | Normal           | Normal | Normal |

|                                | 42               | 43               | 44               | 45  | 56  |
|--------------------------------|------------------|------------------|------------------|-----|-----|
| ALP (U/L)                      | 65               | 85               | 74               | 79  | 61  |
| AST (U/L)                      | 205              | 85               | 431              | 88  | 128 |
| ALT (U/L)                      | 86               | 32               | 136              | 41  | 54  |
| Creatine kinase (U/L)          | 551              | 216              | 667              | 321 | 264 |
| Albumin (g/dL)                 | 3.0              | 2.8              | 2.5              | 2.7 | 2.8 |
| Total Bilirubin (mg/dL)        | 0.3              | 0.1              | 0.5              | 0.1 | 0.3 |
| Total Protein (g/dL)           | 5.2              | 4.4              | 4.4              | 4.4 | 4.6 |
| Globulin (g/dL)                | 2.2              | 1.6              | 1.9              | 1.7 | 1.8 |
| Bilirubin - Conjugated (mg/dL) | 0.0              | 0.0              | 0.2              | 0.0 | 0.1 |
| BUN (mg/dL)                    | 16               | 15               | 15               | 16  | 14  |
| Creatinine (mg/dL)             | 0.0 <sup>1</sup> | 0.2 <sup>1</sup> | 0.0 <sup>1</sup> | 0.1 | 0.1 |

|                                  | 42                     | 43     | 44                     | 45     | 56     |
|----------------------------------|------------------------|--------|------------------------|--------|--------|
| Cholesterol (mg/dL)              | 102                    | 92     | 85                     | 97     | 110    |
| Glucose (mg/dL)                  | 289                    | 329    | 243                    | 251    | 252    |
| Calcium (mg/dL)                  | 10.0                   | 9.4    | 8.8                    | 9.1    | 8.9    |
| Phosphorus (mg/dL)               | 13.2                   | 9.4    | 10.3                   | 12.9   | 6.1    |
| Bicarbonate TCO2 (mmol/L)        | 20                     | 19     | 20                     | 17     | 22     |
| Chloride (mmol/L)                | see below <sup>3</sup> | 114    | see below <sup>3</sup> | 116    | 113    |
| Potassium (mmol/L)               | see below <sup>3</sup> | 5.4    | see below <sup>3</sup> | 4.6    | 5.3    |
| ALB/GLOB ratio                   | 1.4                    | 1.8    | 1.3                    | 1.6    | 1.6    |
| Sodium (mmol/L)                  | see below <sup>3</sup> | 149    | see below <sup>3</sup> | 151    | 148    |
| BUN/Creatinine Ratio             | 0.0                    | 75.0   | 0.0                    | 160.0  | 140.0  |
| Bilirubin - Unconjugated (mg/dL) | 0.3                    | 0.1    | 0.3                    | 0.1    | 0.2    |
| NAK Ratio                        | see below <sup>3</sup> | 25     | see below <sup>3</sup> | 31     | 28     |
| Hemolysis Index                  | +                      | Normal | +                      | +      | +      |
| Lipemia Index                    | Normal                 | Normal | Normal                 | Normal | Normal |

|                                | 57               | 58  | 59                     | 60               | 1                 |
|--------------------------------|------------------|-----|------------------------|------------------|-------------------|
| ALP (U/L)                      | 97               | 106 | 43                     | 53               | 39                |
| AST (U/L)                      | 77               | 95  | 216                    | 50               | 678               |
| ALT (U/L)                      | 47               | 42  | 85                     | 36               | 220               |
| Creatine kinase (U/L)          | 146              | 291 | 700                    | 99               | 8872 <sup>1</sup> |
| Albumin (g/dL)                 | 2.9              | 2.8 | 2.8                    | 2.4              | 2.5               |
| Total Bilirubin (mg/dL)        | 0.1              | 0.2 | 0.4                    | 0.1              | 0.3               |
| Total Protein (g/dL)           | 4.7              | 4.5 | 5.0                    | 4.2              | 4.5               |
| Globulin (g/dL)                | 1.8              | 1.7 | 2.2                    | 1.8              | 2.0               |
| Bilirubin - Conjugated (mg/dL) | 0.0              | 0.0 | 0.0                    | 0.0              | 0.0               |
| BUN (mg/dL)                    | 18               | 17  | 18                     | 14               | 27                |
| Creatinine (mg/dL)             | 0.1 <sup>1</sup> | 0.1 | 0.0 <sup>1</sup>       | 0.1 <sup>1</sup> | 0.1 <sup>1</sup>  |
| Cholesterol (mg/dL)            | 110              | 106 | 110                    | 98               | 112               |
| Glucose (mg/dL)                | 278              | 290 | 316                    | 263              | 252               |
| Calcium (mg/dL)                | 8.9              | 9.2 | 8.9                    | 8.4              | 8.6               |
| Phosphorus (mg/dL)             | 7.0              | 8.7 | 9.1                    | 11.0             | 8.2               |
| Bicarbonate TCO2 (mmol/L)      | 22               | 20  | 17                     | 24               | 16                |
| Chloride (mmol/L)              | 117              | 116 | see below <sup>3</sup> | 116              | 110               |
| Potassium (mmol/L)             | 4.9              | 6.1 | see below <sup>3</sup> | 5.3              | 8.0 <sup>1</sup>  |
| ALB/GLOB ratio                 | 1.6              | 1.6 | 1.3                    | 1.3              | 1.3               |

|                                  | 57     | 58     | 59                     | 60     | 1      |
|----------------------------------|--------|--------|------------------------|--------|--------|
| Sodium (mmd/L)                   | 150    | 150    | see below <sup>3</sup> | 147    | 144    |
| BUN/Creatinine Ratio             | 180.0  | 170.0  | 0.0                    | 140.0  | 270.0  |
| Bilirubin - Unconjugated (mg/dL) | 0.1    | 0.2    | 0.4                    | 0.1    | 0.3    |
| NAK Ratio                        | 31     | 25     | see below <sup>3</sup> | 28     | 18     |
| Hemolysis Index                  | Normal | +      | ++                     | Normal | +++    |
| Lipemia Index                    | Normal | Normal | Normal                 | Normal | Normal |

|                                  | 2                | 4                      | 5                | 16     | 17                     |
|----------------------------------|------------------|------------------------|------------------|--------|------------------------|
| ALP (U/L)                        | 37               | 42                     | 27               | 66     | 21                     |
| AST (U/L)                        | 38               | 47                     | 47               | 171    | 901                    |
| ALT (U/L)                        | 38               | 36                     | 41               | 141    | 180                    |
| Creatine kinase (U/L)            | 97               | 96                     | 102              | 159    | see below <sup>2</sup> |
| Albumin (g/dL)                   | 2.4              | 2.2                    | 2.4              | 2.5    | 2.4                    |
| Total Bilirubin (mg/dL)          | 0.2              | 0.2                    | 0.3              | 0.3    | 0.5                    |
| Total Protein (g/dL)             | 4.6              | 4.3                    | 4.7              | 4.6    | 4.5                    |
| Globulin (g/dL)                  | 2.2              | 2.1                    | 2.3              | 2.1    | 2.1                    |
| Bilirubin - Conjugated (mg/dL)   | 0.0              | 0.0                    | 0.0              | 0.0    | 0.1                    |
| BUN (mg/dL)                      | 34               | 22                     | 30               | 28     | 16                     |
| Creatinine (mg/dL)               | 0.1 <sup>1</sup> | 0.0 <sup>1</sup>       | 0.1 <sup>1</sup> | 0.1    | 0.1                    |
| Cholesterol (mg/dL)              | 136              | 103                    | 125              | 146    | 125                    |
| Glucose (mg/dL)                  | 238              | 220                    | 273              | 267    | 232                    |
| Calcium (mg/dL)                  | 9.1              | 9.1                    | 8.9              | 9.4    | 8.2                    |
| Phosphorus (mg/dL)               | 8.6              | 10.7                   | 11.2             | 9.4    | 10.7                   |
| Bicarbonate TCO2 (mmol/L)        | 22               | 22                     | 19               | 13     | 15                     |
| Chloride (mmol/L)                | 112              | see below <sup>3</sup> | 112              | 111    | 110                    |
| Potassium (mmol/L)               | 5.8              | see below <sup>3</sup> | 6.7              | 6.5    | 8.3                    |
| ALB/GLOB ratio                   | 1.1              | 1.0                    | 1.0              | 1.2    | 1.1                    |
| Sodium (mmd/L)                   | 151              | see below <sup>3</sup> | 149              | 150    | 150                    |
| BUN/Creatinine Ratio             | 340.0            | 0.0                    | 300.0            | 280.0  | 160.0                  |
| Bilirubin - Unconjugated (mg/dL) | 0.2              | 0.2                    | 0.3              | 0.3    | 0.4                    |
| NAK Ratio                        | 26               | see below <sup>3</sup> | 22               | 23     | 18                     |
| Hemolysis Index                  | ++               | +                      | +++              | +++    | ++++                   |
| Lipemia Index                    | Normal           | Normal                 | Normal           | Normal | Normal                 |

|                                  | 18                     | 20                     | 31                     | 32                     | 33                     |
|----------------------------------|------------------------|------------------------|------------------------|------------------------|------------------------|
| ALP (U/L)                        | 29                     | 54                     | 67                     | 60                     | 68                     |
| AST (U/L)                        | 105                    | 90                     | 191                    | 70                     | 288                    |
| ALT (U/L)                        | 70                     | 88                     | 50                     | 37                     | 120                    |
| Creatine kinase (U/L)            | 235                    | 95                     | 639                    | 165                    | 610                    |
| Albumin (g/dL)                   | 2.3                    | 2.6                    | 3.0                    | 2.4                    | 2.9                    |
| Total Bilirubin (mg/dL)          | 0.4                    | 0.3                    | 0.4                    | 0.2                    | 0.3                    |
| Total Protein (g/dL)             | 4.9                    | 5.1                    | 5.2                    | 4.2                    | 4.9                    |
| Globulin (g/dL)                  | 2.6                    | 2.5                    | 2.2                    | 1.8                    | 2.0                    |
| Bilirubin - Conjugated (mg/dL)   | 0.0                    | 0.0                    | 0.1                    | 0.0                    | 0.0                    |
| BUN (mg/dL)                      | 26                     | 23                     | 22                     | 15                     | 19                     |
| Creatinine (mg/dL)               | 0.0 <sup>1</sup>       |
| Cholesterol (mg/dL)              | 124                    | 130                    | 109                    | 93                     | 96                     |
| Glucose (mg/dL)                  | 225                    | 178                    | 272                    | 224                    | 229                    |
| Calcium (mg/dL)                  | 8.2                    | 10.2                   | 10.3                   | 7.1                    | 9.9                    |
| Phosphorus (mg/dL)               | 11.6                   | 13.7                   | 11.6                   | 8.2                    | 12.3                   |
| Bicarbonate TCO2 (mmol/L)        | 19                     | 17                     | 19                     | 13                     | 17                     |
| Chloride (mmol/L)                | see below <sup>3</sup> |
| Potassium (mmol/L)               | see below <sup>3</sup> |
| ALB/GLOB ratio                   | 0.9                    | 1.0                    | 1.4                    | 1.3                    | 1.5                    |
| Sodium (mmol/L)                  | see below <sup>3</sup> |
| BUN/Creatinine Ratio             | 0.0                    | 0.0                    | 0.0                    | 0.0                    | 0.0                    |
| Bilirubin - Unconjugated (mg/dL) | 0.4                    | 0.3                    | 0.3                    | 0.2                    | 0.3                    |
| NAK Ratio                        | see below <sup>3</sup> |
| Hemolysis Index                  | **                     | +                      | **                     | Normal                 | +                      |
| Lipemia Index                    | Normal                 | Normal                 | Normal                 | Normal                 | Normal                 |

  

|                         | 34  | 35  | 46  | 47  | 48  |
|-------------------------|-----|-----|-----|-----|-----|
| ALP (U/L)               | 68  | 68  | 72  | 54  | 85  |
| AST (U/L)               | 74  | 114 | 116 | 100 | 93  |
| ALT (U/L)               | 35  | 81  | 75  | 48  | 59  |
| Creatine kinase (U/L)   | 199 | 254 | 123 | 239 | 163 |
| Albumin (g/dL)          | 3.0 | 3.0 | 2.6 | 2.6 | 2.9 |
| Total Bilirubin (mg/dL) | 0.3 | 0.2 | 0.2 | 0.1 | 0.3 |

|                                  | 34               | 35                     | 46                     | 47     | 48                     |
|----------------------------------|------------------|------------------------|------------------------|--------|------------------------|
| Total Protein (g/dL)             | 4.9              | 5.1                    | 4.8                    | 4.6    | 5.1                    |
| Globulin (g/dL)                  | 1.9              | 2.1                    | 2.2                    | 2.0    | 2.2                    |
| Bilirubin - Conjugated (mg/dL)   | 0.0              | 0.0                    | 0.0                    | 0.0    | 0.0                    |
| BUN (mg/dL)                      | 18               | 84                     | 12                     | 15     | 15                     |
| Creatinine (mg/dL)               | 0.1 <sup>1</sup> | 0.0 <sup>1</sup>       | 0.0 <sup>1</sup>       | 0.1    | 0.0 <sup>1</sup>       |
| Cholesterol (mg/dL)              | 109              | 110                    | 106                    | 117    | 105                    |
| Glucose (mg/dL)                  | 325              | 238                    | 273                    | 261    | 240                    |
| Calcium (mg/dL)                  | 8.3              | 9.9                    | 9.2                    | 9.9    | 10.1                   |
| Phosphorus (mg/dL)               | 9.7              | 13.2                   | 6.1                    | 8.0    | 12.7                   |
| Bicarbonate TCO2 (mmol/L)        | 21               | 18                     | 16                     | 16     | 23                     |
| Chloride (mmol/L)                | 113              | see below <sup>3</sup> | see below <sup>3</sup> | 114    | see below <sup>3</sup> |
| Potassium (mmol/L)               | 6.3              | see below <sup>3</sup> | see below <sup>3</sup> | 6.6    | see below <sup>3</sup> |
| ALB/GLOB ratio                   | 1.6              | 1.4                    | 1.2                    | 1.3    | 1.3                    |
| Sodium (mmol/L)                  | 147              | see below <sup>3</sup> | see below <sup>3</sup> | 147    | see below <sup>3</sup> |
| BUN/Creatinine Ratio             | 180.0            | 0.0                    | 0.0                    | 150.0  | 0.0                    |
| Bilirubin - Unconjugated (mg/dL) | 0.3              | 0.2                    | 0.2                    | 0.1    | 0.3                    |
| NAK Ratio                        | 23               | see below <sup>3</sup> | see below <sup>3</sup> | 31     | see below <sup>3</sup> |
| Hemolysis Index                  | ++++             | +                      | +                      | Normal | +                      |
| Lipemia Index                    | Normal           | Normal                 | Normal                 | Normal | Normal                 |

|                                | 6                | 7                | 8                | 9                | 10               |
|--------------------------------|------------------|------------------|------------------|------------------|------------------|
| ALP (U/L)                      | 30               | 31               | 31               | 47               | 42               |
| AST (U/L)                      | 136              | 90               | 147              | 340              | 110              |
| ALT (U/L)                      | 92               | 44               | 73               | 111              | 47               |
| Creatine kinase (U/L)          | 326              | 241              | 354              | 1782             | 439              |
| Albumin (g/dL)                 | 2.3              | 2.8              | 2.3              | 2.8              | 2.4              |
| Total Bilirubin (mg/dL)        | 0.2              | 0.2              | 0.3              | 0.3              | 0.3              |
| Total Protein (g/dL)           | 4.5              | 4.8              | 4.3              | 5.1              | 4.6              |
| Globulin (g/dL)                | 2.2              | 2.0              | 2.0              | 2.3              | 2.2              |
| Bilirubin - Conjugated (mg/dL) | 0.0              | 0.1              | 0.1              | 0.0              | 0.0              |
| BUN (mg/dL)                    | 21               | 18               | 18               | 21               | 29               |
| Creatinine (mg/dL)             | 0.1 <sup>1</sup> | 0.1 <sup>1</sup> | 0.0 <sup>1</sup> | 0.0 <sup>1</sup> | 0.0 <sup>1</sup> |
| Cholesterol (mg/dL)            | 124              | 132              | 106              | 110              | 110              |
| Glucose (mg/dL)                | 265              | 269              | 223              | 292              | 205              |
| Calcium (mg/dL)                | 8.8              | 9.0              | 7.7              | 9.3              | 8.6              |

|                                  | 6      | 7      | 8                      | 9                      | 10                     |
|----------------------------------|--------|--------|------------------------|------------------------|------------------------|
| Phosphorus (mg/dL)               | 7.8    | 7.6    | 6.0                    | 7.3                    | 8.8                    |
| Bicarbonate TCO2 (mmol/L)        | 20     | 23     | 18                     | 26                     | 22                     |
| Chloride (mmol/L)                | 112    | 111    | see below <sup>3</sup> | see below <sup>3</sup> | see below <sup>3</sup> |
| Potassium (mmol/L)               | 6.5    | 6.4    | see below <sup>3</sup> | see below <sup>3</sup> | see below <sup>3</sup> |
| ALBGLOB ratio                    | 1.0    | 1.4    | 1.2                    | 1.2                    | 1.1                    |
| Sodium (mmol/L)                  | 149    | 149    | see below <sup>3</sup> | see below <sup>3</sup> | see below <sup>3</sup> |
| BUN/Creatinine Ratio             | 210.0  | 180.0  | 0.0                    | 0.0                    | 0.0                    |
| Bilirubin - Unconjugated (mg/dL) | 0.2    | 0.1    | 0.2                    | 0.3                    | 0.3                    |
| NAK Ratio                        | 23     | 23     | see below <sup>3</sup> | see below <sup>3</sup> | see below <sup>3</sup> |
| Hemolysis Index                  | +      | ++     | +                      | +                      | +                      |
| Lipemia Index                    | Normal | Normal | Normal                 | Normal                 | Normal                 |

|                                | 21               | 22               | 23                     | 24               | 25                     |
|--------------------------------|------------------|------------------|------------------------|------------------|------------------------|
| ALP (U/L)                      | 44               | 37               | 42                     | 42               | 78                     |
| AST (U/L)                      | 45               | 55               | 115                    | 77               | 74                     |
| ALT (U/L)                      | 31               | 42               | 47                     | 31               | 35                     |
| Creatine kinase (U/L)          | 226              | 261              | 346                    | 299              | 341                    |
| Albumin (g/dL)                 | 2.4              | 2.4              | 2.4                    | 2.3              | 2.6                    |
| Total Bilirubin (mg/dL)        | 0.2              | 0.3              | 0.3                    | 0.2              | 0.2                    |
| Total Protein (g/dL)           | 4.7              | 4.6              | 4.5                    | 4.4              | 4.9                    |
| Globulin (g/dL)                | 2.3              | 2.2              | 2.1                    | 2.1              | 2.3                    |
| Bilirubin - Conjugated (mg/dL) | 0.1              | 0.0              | 0.0                    | 0.0              | 0.0                    |
| BUN (mg/dL)                    | 15               | 21               | 23                     | 15               | 17                     |
| Creatinine (mg/dL)             | 0.1 <sup>1</sup> | 0.1 <sup>1</sup> | 0.0 <sup>1</sup>       | 0.1 <sup>1</sup> | 0.0 <sup>1</sup>       |
| Cholesterol (mg/dL)            | 114              | 147              | 115                    | 117              | 152                    |
| Glucose (mg/dL)                | 222              | 257              | 275                    | 241              | 291                    |
| Calcium (mg/dL)                | 8.1              | 8.9              | 8.3                    | 8.4              | 9.9                    |
| Phosphorus (mg/dL)             | 6.9              | 7.5              | 7.8                    | 8.7              | 9.0                    |
| Bicarbonate TCO2 (mmol/L)      | 20               | 22               | 18                     | 17               | 24                     |
| Chloride (mmol/L)              | 111              | 113              | see below <sup>3</sup> | 114              | see below <sup>3</sup> |
| Potassium (mmol/L)             | 5.2              | 5.6              | see below <sup>3</sup> | 4.7              | see below <sup>3</sup> |
| ALBGLOB ratio                  | 1.0              | 1.1              | 1.1                    | 1.1              | 1.1                    |
| Sodium (mmol/L)                | 148              | 149              | see below <sup>3</sup> | 149              | see below <sup>3</sup> |
| BUN/Creatinine Ratio           | 150.0            | 210.0            | 0.0                    | 150.0            | 0.0                    |

|                                  | 21     | 22     | 23                     | 24     | 25                     |
|----------------------------------|--------|--------|------------------------|--------|------------------------|
| Bilirubin - Unconjugated (mg/dL) | 0.1    | 0.3    | 0.3                    | 0.2    | 0.2                    |
| NAK Ratio                        | 29     | 27     | see below <sup>3</sup> | 32     | see below <sup>3</sup> |
| Hemolysis Index                  | Normal | ++     | +                      | Normal | Normal                 |
| Lipemia Index                    | Normal | Normal | Normal                 | Normal | Normal                 |

|                                  | 36                     | 37                     | 38                     | 39                     | 40                     |
|----------------------------------|------------------------|------------------------|------------------------|------------------------|------------------------|
| ALP (U/L)                        | 78                     | 81                     | 56                     | 71                     | 67                     |
| AST (U/L)                        | 123                    | 78                     | 65                     | 47                     | 253                    |
| ALT (U/L)                        | 44                     | 44                     | 43                     | 34                     | 73                     |
| Creatine kinase (U/L)            | 458                    | 306                    | 124                    | 135                    | 1475                   |
| Albumin (g/dL)                   | 2.8                    | 3.0                    | 2.8                    | 3.0                    | 2.6                    |
| Total Bilirubin (mg/dL)          | 0.2                    | 0.2                    | 0.1                    | 0.1                    | 0.2                    |
| Total Protein (g/dL)             | 4.7                    | 5.1                    | 5.0                    | 5.3                    | 4.6                    |
| Globulin (g/dL)                  | 1.9                    | 2.1                    | 2.2                    | 2.3                    | 2.0                    |
| Bilirubin - Conjugated (mg/dL)   | 0.0                    | 0.1                    | 0.0                    | 0.0                    | 0.0                    |
| BUN (mg/dL)                      | 16                     | 13                     | 20                     | 14                     | 15                     |
| Creatinine (mg/dL)               | 0.0 <sup>1</sup>       |
| Cholesterol (mg/dL)              | 100                    | 113                    | 109                    | 118                    | 87                     |
| Glucose (mg/dL)                  | 297                    | 292                    | 328                    | 347                    | 243                    |
| Calcium (mg/dL)                  | 8.4                    | 10.2                   | 9.6                    | 9.9                    | 8.3                    |
| Phosphorus (mg/dL)               | 6.4                    | 7.2                    | 6.1                    | 6.8                    | 6.9                    |
| Bicarbonate TCO2 (mmol/L)        | 18                     | 22                     | 25                     | 26                     | 19                     |
| Chloride (mmol/L)                | see below <sup>3</sup> |
| Potassium (mmol/L)               | see below <sup>3</sup> |
| ALBGLOB ratio                    | 1.5                    | 1.4                    | 1.3                    | 1.3                    | 1.3                    |
| Sodium (mmol/L)                  | see below <sup>3</sup> |
| BUN/Creatinine Ratio             | 0.0                    | 0.0                    | 0.0                    | 0.0                    | 0.0                    |
| Bilirubin - Unconjugated (mg/dL) | 0.2                    | 0.1                    | 0.1                    | 0.1                    | 0.2                    |
| NAK Ratio                        | see below <sup>3</sup> |
| Hemolysis Index                  | Normal                 | Normal                 | Normal                 | Normal                 | +                      |
| Lipemia Index                    | Normal                 | Normal                 | Normal                 | Normal                 | Normal                 |

|           | 51 | 52 | 53 | 54 | 55 |
|-----------|----|----|----|----|----|
| ALP (U/L) | 63 | 50 | 55 | 44 | 67 |



|                                  | 51                     | 52                     | 53               | 54                     | 55               |
|----------------------------------|------------------------|------------------------|------------------|------------------------|------------------|
| AST (U/L)                        | 39                     | 167                    | 37               | 152                    | 47               |
| ALT (U/L)                        | 34                     | 55                     | 32               | 48                     | 32               |
| Creatine kinase (U/L)            | 76                     | 639                    | 68               | 571                    | 139              |
| Albumin (g/dL)                   | 2.7                    | 2.5                    | 2.7              | 2.7                    | 2.7              |
| Total Bilirubin (mg/dL)          | 0.1                    | 0.2                    | 0.2              | 0.2                    | 0.1              |
| Total Protein (g/dL)             | 5.0                    | 4.6                    | 4.9              | 4.9                    | 4.5              |
| Globulin (g/dL)                  | 2.3                    | 2.1                    | 2.2              | 2.2                    | 1.8              |
| Bilirubin - Conjugated (mg/dL)   | 0.0                    | 0.0                    | 0.1              | 0.0                    | 0.0              |
| BUN (mg/dL)                      | 19                     | 17                     | 13               | 16                     | 18               |
| Creatinine (mg/dL)               | 0.0 <sup>1</sup>       | 0.0 <sup>1</sup>       | 0.1 <sup>1</sup> | 0.0 <sup>1</sup>       | 0.1 <sup>1</sup> |
| Cholesterol (mg/dL)              | 109                    | 105                    | 105              | 104                    | 108              |
| Glucose (mg/dL)                  | 323                    | 331                    | 275              | 269                    | 240              |
| Calcium (mg/dL)                  | 10.1                   | 9.0                    | 9.8              | 9.4                    | 9.4              |
| Phosphorus (mg/dL)               | 5.8                    | 6.3                    | 7.2              | 7.7                    | 9.5              |
| Bicarbonate TCO2 (mmol/L)        | 26                     | 25                     | 20               | 21                     | 20               |
| Chloride (mmol/L)                | see below <sup>3</sup> | see below <sup>3</sup> | 113              | see below <sup>3</sup> | 111              |
| Potassium (mmol/L)               | see below <sup>3</sup> | see below <sup>3</sup> | 4.5              | see below <sup>3</sup> | 4.5              |
| ALB/GLOB ratio                   | 1.2                    | 1.2                    | 1.2              | 1.2                    | 1.5              |
| Sodium (mmol/L)                  | see below <sup>3</sup> | see below <sup>3</sup> | 151              | see below <sup>3</sup> | 146              |
| BUN/Creatinine Ratio             | 0.0                    | 0.0                    | 130.0            | 0.0                    | 180.0            |
| Bilirubin - Unconjugated (mg/dL) | 0.1                    | 0.2                    | 0.1              | 0.2                    | 0.1              |
| NA/K Ratio                       | see below <sup>3</sup> | see below <sup>3</sup> | 34               | see below <sup>3</sup> | 32               |
| Hemolysis Index                  | Normal                 | Normal                 | Normal           | +                      | Normal           |
| Lipemia Index                    | Normal                 | Normal                 | Normal           | Normal                 | Normal           |

Figure S4. Full panel of clinical chemistry analytes analyzed to evaluate effect of LUNAR®-hPAH mRNA (LUNAR 1) delivery in liver and kidney markers (n=15 mice per group).
